# Supplementary material for: Misregulation of the LOB domain gene DDA1 suggests possible functions in auxin signalling and photomorphogenesis
Source: PubMed Central journal article supplement — J Exp Bot. 2010 Aug 25;62(1):221–33. doi: 10.1093/jxb/erq259 (PMC2993911; doi:10.1093/jxb/erq259), 2010-08-25

**Misregulation of the LOB-Domain gene *DDA1* suggests possible functions in auxin signaling and photomorphogenesis.** Amanda Mangeon, Elizabeth M. Bell, Wan-ching Lin, Barbara Jablonska and Patricia S. Springer

### Supplementary Data

**Supplementary Figure S1.** Dose-response curve, examining auxin responses in *dda1-1* seedlings compared to wild-type and the auxin response mutant *axr1-3*. Seedlings were grown on unsupplemented media for 4 days, then transferred to 2,4-D-supplemented media. After 3 days, root length was measured. Response to auxin is plotted as growth on 2,4-D relative to growth on unsupplemented media. A minimum of 10 seedlings was assayed for each background. Error bars represent standard error.

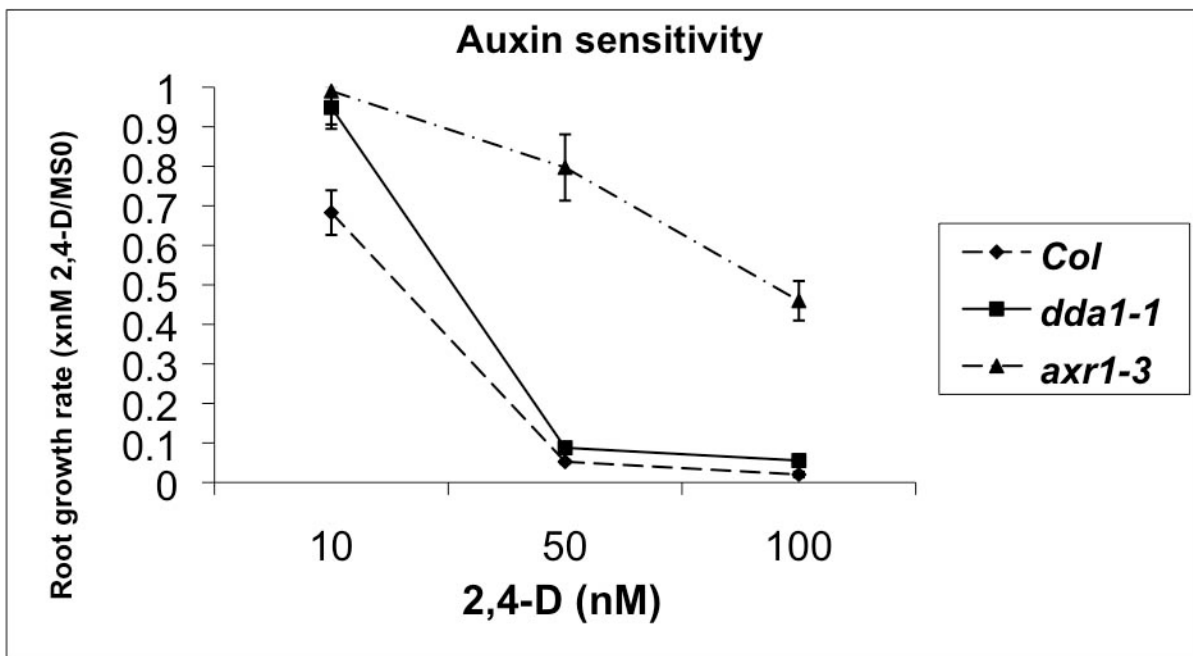

**Supplementary Figure S2.** RT-PCR analyses of *DDA1* and *ACT2* transcript levels using different amounts (1, 3, and 5 volumes) of cDNA template demonstrated that the PCR reactions were quantitative under these conditions.

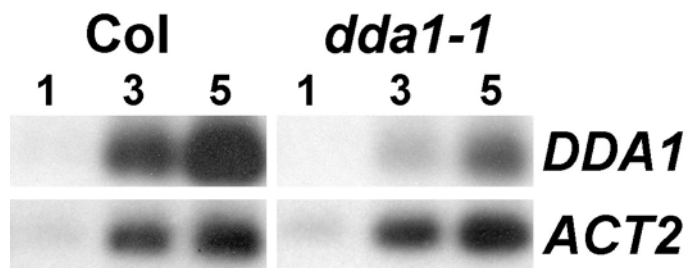

Supplement: supp_erq259_00044289-file001.pdf [file supp_erq259_00044289-file001.pdf]
